# Supplementary material for: Roles of BCCIP deficiency in mammary tumorigenesis
Source: Springer Nature journal article supplement (doi:10.1186/s13058-017-0907-5), 2017-10-18
Supplement: MOESM1 [file 15145080]

**Table S1, BCCIP protein expression in subtypes of non-triple negative breast cancers**

|                   | BCCIP (-)  | BCCIP (+)   | Total cases |           |
|-------------------|------------|-------------|-------------|-----------|
| Total Non-TNBC    | 70 (22.4%) | 243 (77.6%) | 313         |           |
| ER-/Her2-         | 15 (40.5%) | 22 (59.5%)  | 37          | P=0.4233  |
| ER-/Her2+         | 10 (31.3)  | 22 (68.7)   | 32          |           |
| Total             | 25 (30.4%) | 44 (69.6%)  | 69          |           |
| ER+/Her2-         | 39 (19.9)  | 157 (80.1%) | 196         | P=0.8847  |
| ER+/Her2+         | 10 (20.8%) | 38 (79.2%)  | 48          |           |
| Total             | 49 (20.1%) | 195 (79.9%) | 244         |           |
| ER-               | 21 (30.4%) | 48 (69.6%)  | 69          | P=0.0684  |
| ER+               | 49 (20.1%) | 195 (79.9%) | 244         |           |
| Total             | 70 (22.4%) | 243 (77.6%) | 313         |           |
| Her2-             | 54 (23.2%) | 179         | 233         | P=0.7404  |
| Her2+             | 20 (25%)   | 60 (75%)    | 80          |           |
| Total             | 74 (23.6%) | 239 (76.4)  | 313         |           |
| Non-TNBC DCIS     | 13 (32.5%) | 27 (67.5%)  | 40          | P= 0.1580 |
| Non-TNBC non NCIS | 61 (22.3%) | 212 (77.7%) | 273         |           |
| Total             | 74 (23.6%) | 239 (76.4%) | 313         |           |
| DCIS-TNBC         | 5 (38.5)   | 8 (61.5%)   | 13          | P=0.6933  |
| DCIS- Non-TNBC    | 13 (32.5%) | 27 (67.5%)  | 40          |           |
| Total             | 18 (34.0%) | 35 (66.0%)  | 53          |           |

**Table S2. Tumor incidence and average age (weeks) of onset with k14-Cre mediated p53 deletion.**

| P53 state | BCCIP status | Total # of mice | Mice with mammary gland tumors | Mice with skin tumors | Total # of mice with tumors * | P-value between total tumor incidence of CON and CKD |
|-----------|--------------|-----------------|--------------------------------|-----------------------|-------------------------------|------------------------------------------------------|
| p53-/-    | BCCIP-CON    | 20              | 9 (46.5 wk)                    | 11 (45.1 wk)          | 16 (45.7 wk)                  | P=0.2106                                             |
|           | BCCIP-CKD    | 17              | 10 (38.3 wk)                   | 11 (40.8 wk)          | 16 (38.1 wk)                  |                                                      |
| p53+/-    | BCCIP-CON    | 25              | 9 (61.8 wk)                    | 16 (58.6 wk)          | 16 (58.6 wk)                  | P=0.1201                                             |
|           | BCCIP-CKD    | 15              | 6 (66.9 wk)                    | 8 (71.2 wk)           | 13 (70.1 wk)                  |                                                      |

\* Some of the mice developed multiple tumors including mammary, skin, and occasionally other tumor type, but they were counted as one mouse with tumor.

**Table S3. Skin cancer incidence and average onset age (in weeks) with k14-Cre mediated p53 deletion.**

|         |               | Sex    | Total # of mice | Mice with skin tumors | P-value |
|---------|---------------|--------|-----------------|-----------------------|---------|
| p53 -/- | BCCIP-<br>CON | Female | 20              | 11 (45.1 weeks)       | P=0.024 |
|         |               | Male   | 18              | 11 (36.2 weeks)       |         |
|         |               | Total  | 38              | 22 (40.9 weeks)       |         |
|         | BCCIP-<br>CKD | Female | 17              | 11 (40.8 weeks)       |         |
|         |               | Male   | 9               | 6 (43.5 weeks)        |         |
|         |               | Total  | 26              | 22 (38.4 weeks)       |         |
| p53 +/- | BCCIP-<br>CON | Female | 25              | 16 (58.6 weeks)       | P= 0.46 |
|         |               | Male   | 15              | 6 (50.7 weeks)        |         |
|         |               | Total  | 40              | 22 (56.5 weeks)       |         |
|         | BCCIP-<br>CKD | Female | 15              | 8 (71.2 weeks)        |         |
|         |               | Male   | 5               | 5 (62.0 weeks)        |         |
|         |               | Total  | 20              | 13 (67.6 weeks)       |         |

## Figure S1

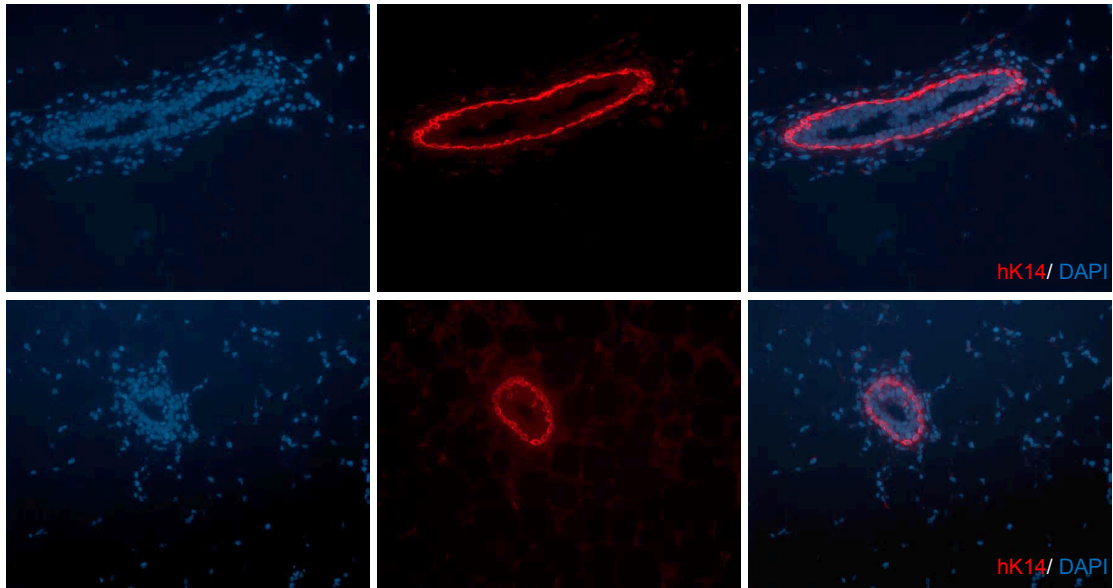

**Figure S1 : hK14 is expressed and detected in myoepithelial/ suprabasal cells in the mammary gland of adult FVB-NJ mice.** Paraffin embedded tissue sections were processed and incubated with hK14 antibody. Top panel shows a representative image of a mammary duct where a single layer of K14 (red) reactive cells that surrounds a layer of luminal cells visible with DAPI. The bottom panels show a cross section view of a mammary duct where the concentric layers of epithelial cells is appreciated and the k14 positive cells locate to the most outer layer in the structure.

## Figure S2

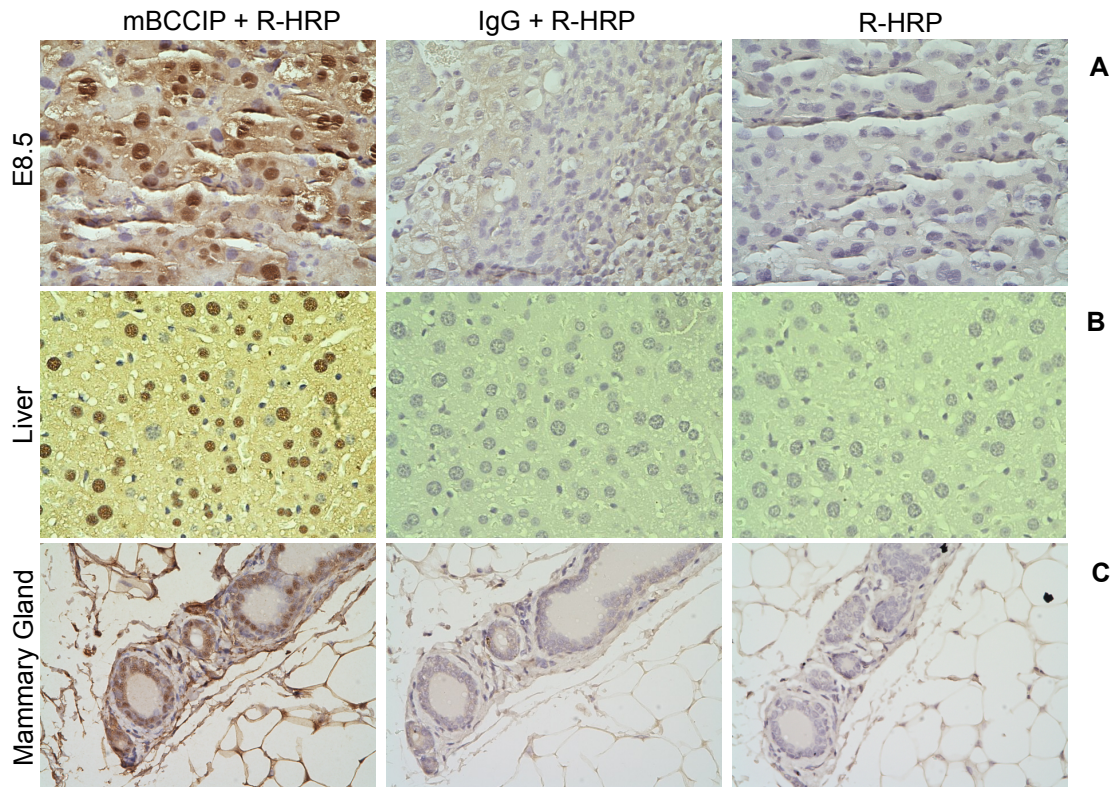

**Figure S2: Validation of mouse BCCIP antibody for IHC staining with paraffin embedded tissues.** Paraffin embedded tissue sections from: mouse embryos, mouse liver, and mouse mammary glands were subjected to heat induced antigen retrieval and then incubated with *mBCCIP* antibody (left panels), non-immune immunoglobulins (center panels), or with sera used as diluent (right panels). *mBCCIP* antibody reacts with specificity in mouse tissues and locates primarily to the nuclear compartment in liver but with some reactivity in cytoplasm of embryonic and mammary gland tissues. R-HRP: Rhodamine conjugated HRP.

# Figure S3

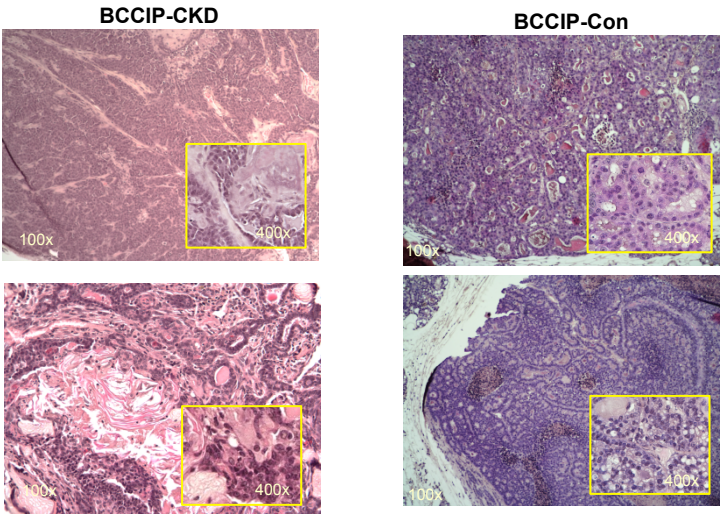

**Figure S3, Histology of 2 pairs of additional malignant tumor from BCCIP-CKD and BCCIP-Con mice.**
